# Supplementary material
Source: Springer Nature journal article supplement (https://www.springermedizin.de/resource/supplementary/12888_2007_468_MOESM1_ESM.pdf/9483350)

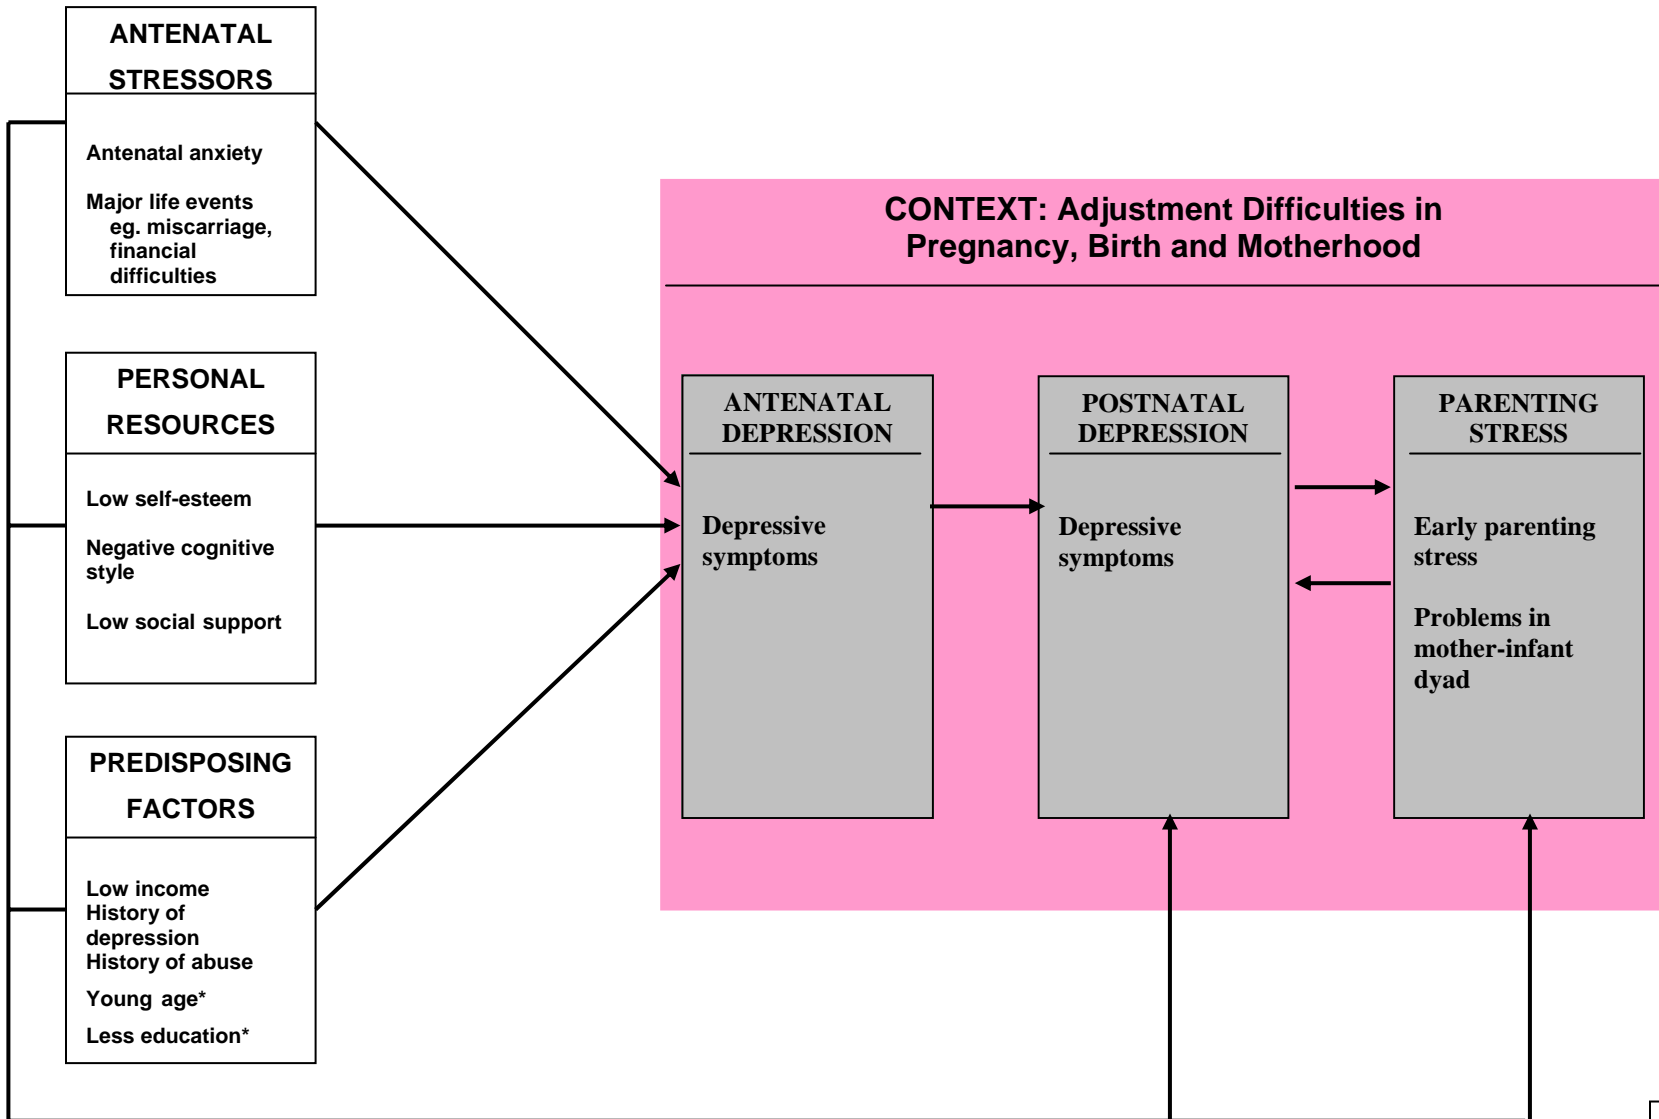

**Legend**

\* Correlated but not predictive of any outcomes

Supplement: MOESM1 [file 9483350]
